# Supplementary material for: Turn-on mode fluorescent diarylethene containing neopentyl substituents that undergoes all-visible-light switching
Source: Royal Society of Chemistry journal article supplement (doi:10.1039/d2cc00554a), 2022-01-01
Supplement: d2cc00554a2.pdf [file d2cc00554a2.pdf]

Electronic Supplementary Information

**Turn-on mode fluorescent diarylethene containing neopentyl substituents that undergoes all-visible-light switching**

Ryo Nishimura,<sup>a</sup> Eri Fujisawa,<sup>a</sup> Ifu Ban,<sup>a</sup> Ryota Iwai,<sup>a</sup> Shoya Takasu,<sup>a</sup> Masakazu Morimoto\*<sup>a</sup> and Masahiro Irie\*<sup>a</sup>

<sup>a</sup> *Department of Chemistry and Research Center for Smart Molecules, Rikkyo University, Nishi-Ikebukuro 3-34-1, Toshima-ku, Tokyo 171-8501, Japan.*

**Movie S1** Colour changes of 1,4-dioxane solutions of **1** (left) and **3** (right) upon irradiation with 405 nm (ca. 230 mW cm<sup>-2</sup>) and 525 nm (ca. 150 mW cm<sup>-2</sup>) LED light.

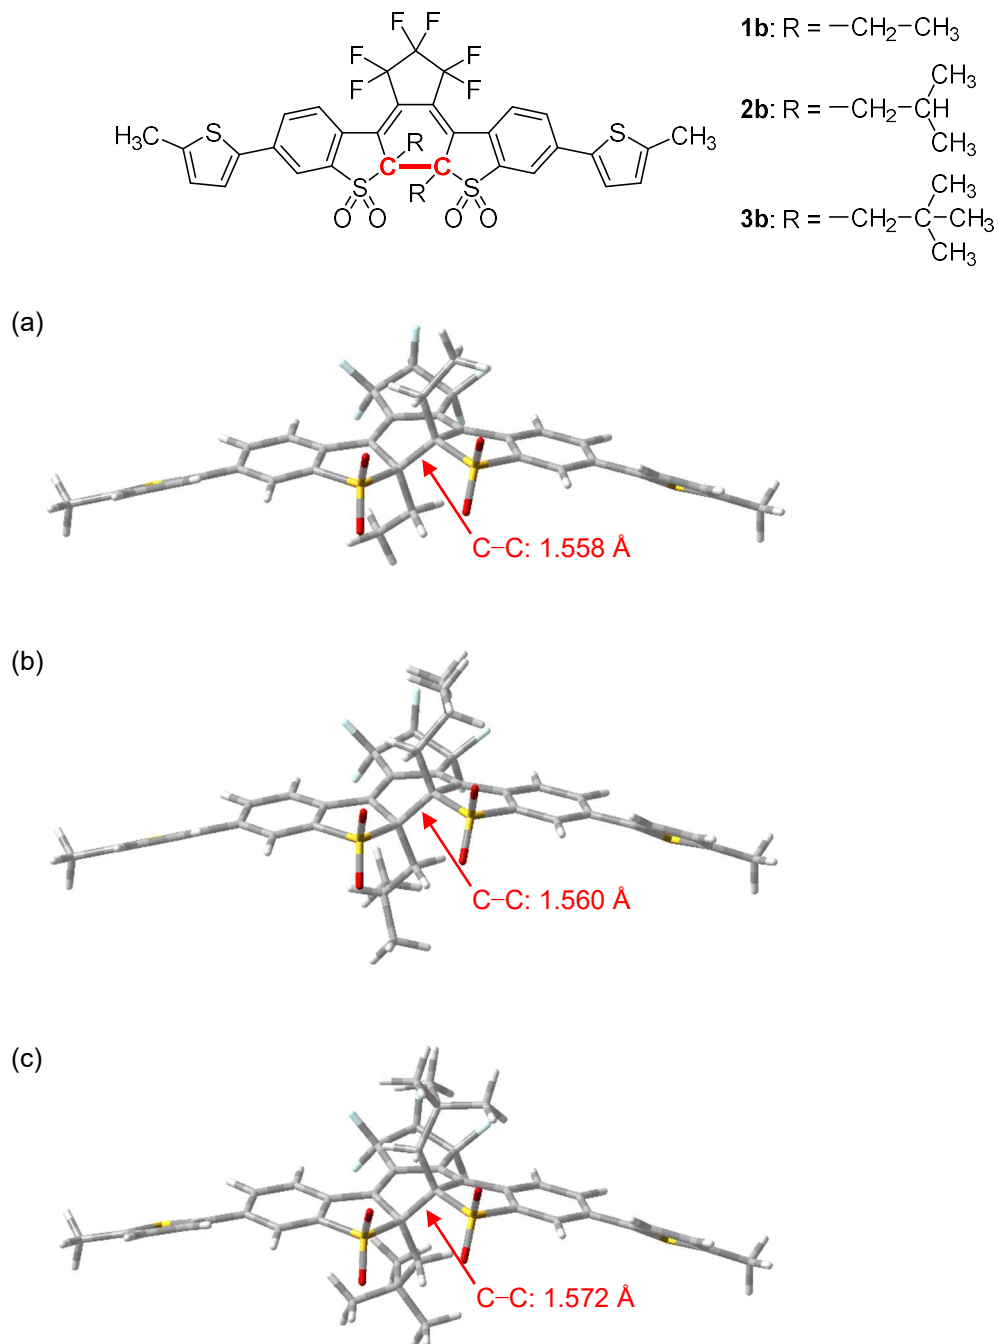

**Fig. S1** Molecular geometries of **1b** (a), **2b** (b) and **3b** (c) in the ground states calculated at  $\omega$ B97XD/6-31G(d) level of theory. The lengths of the covalent bond between the reactive carbon atoms, which is broken in the cycloreversion reaction, are 1.558 Å, 1.560 Å and 1.572 Å for **1b**, **2b** and **3b**, respectively.

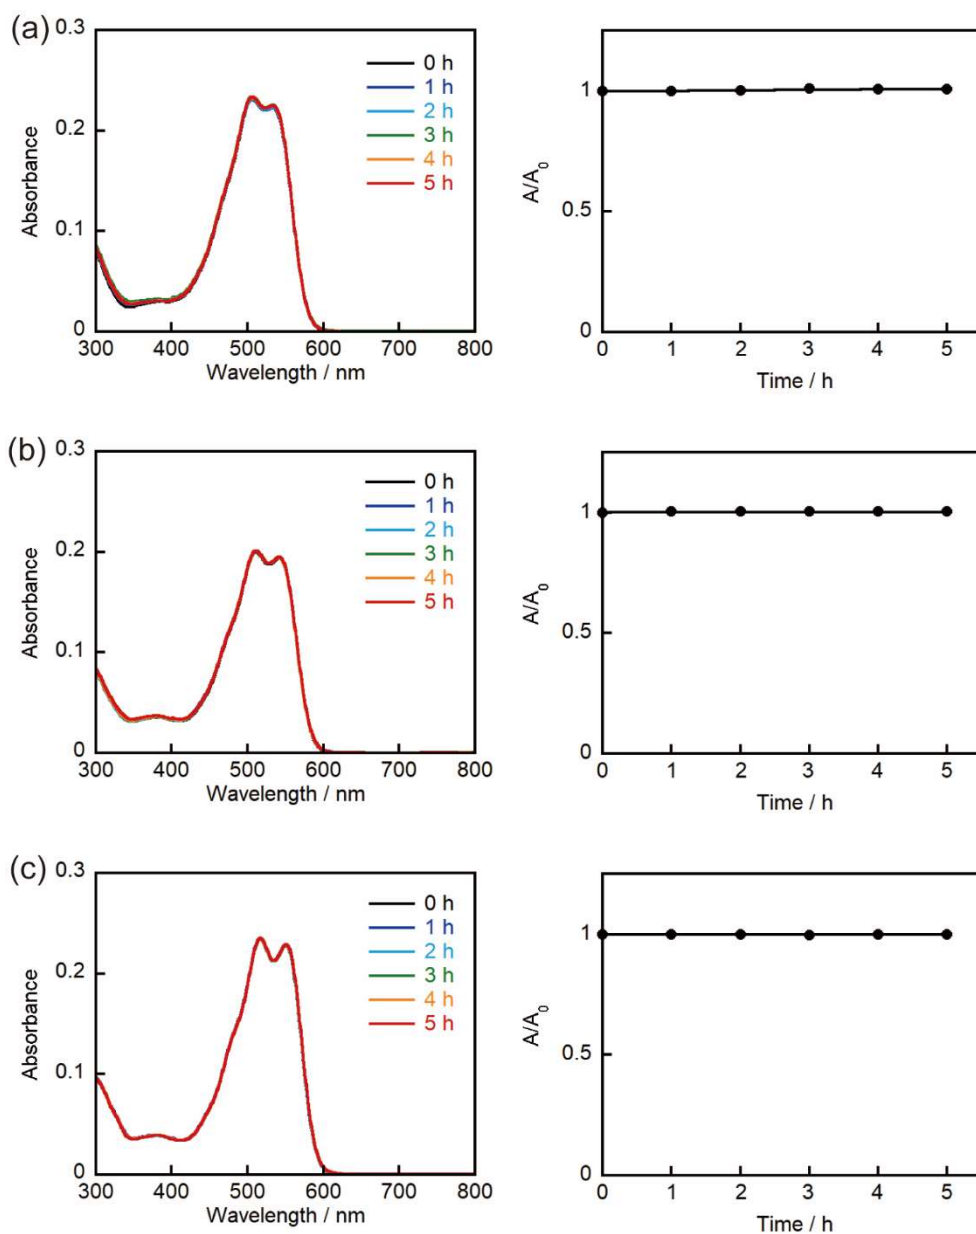

**Fig. S2** Absorption spectra (left) and absorbance changes (right) of **1b** (a), **2b** (b) and **3b** (c) in 1,4-dioxane at 80 °C under a dark condition. Absorbances at 506 nm, 510 nm and 516 nm were monitored for **1b**, **2b** and **3b**, respectively.

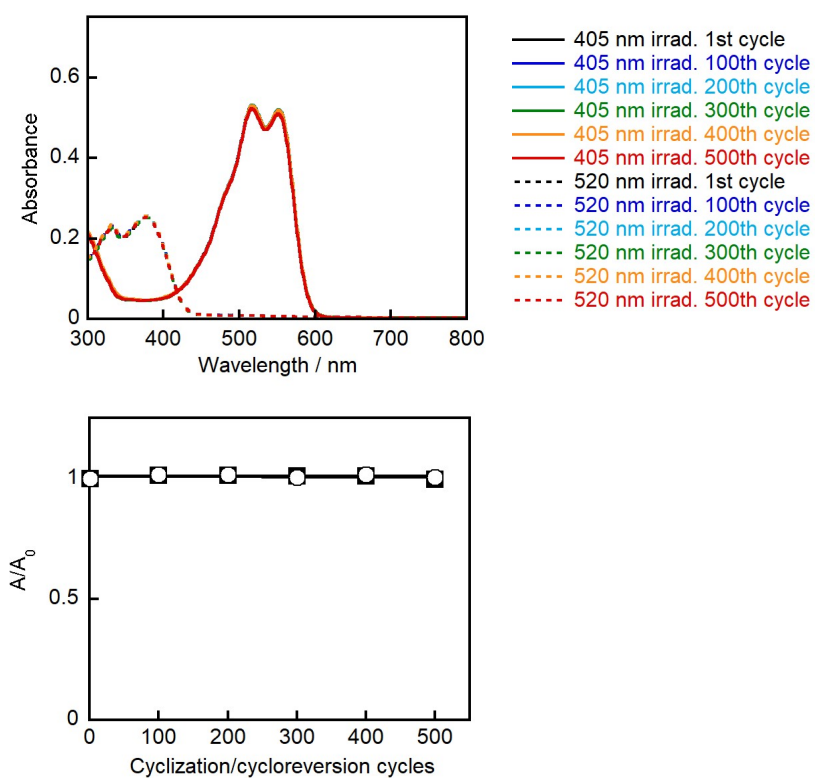

**Fig. S3** Fatigue resistance of **3** against repeating cyclization and cycloreversion reactions in 1,4-dioxane by alternate irradiation with 405 nm light ( $15.6 \text{ mW cm}^{-2}$ , 60 sec) and 520 nm light ( $11.3 \text{ mW cm}^{-2}$ , 600 sec). Top: absorption spectra of **3b** after 405 nm light irradiation (solid lines) and **3a** after 520 nm light irradiation (dotted lines) in every 100 cycles. Bottom: absorbance changes of **3b** at 516 nm after 405 nm light irradiation (black squares) and **3a** at 377 nm after 520 nm light irradiation (open circles) in every 100 cycles.

## Experimental section

**1a** was synthesized according to the previous literature.<sup>S1</sup> Solvents used for spectral measurement were of spectroscopic grade.

<sup>1</sup>H and <sup>13</sup>C NMR spectra were recorded with JEOL ECX-400P NMR spectrometer. For CDCl<sub>3</sub> solution, tetramethylsilane (TMS) was used as an internal standard. For CD<sub>2</sub>Cl<sub>2</sub> solution, the solvent signal (CH<sub>2</sub>Cl<sub>2</sub>: 5.32 ppm, <sup>13</sup>CH<sub>2</sub>Cl<sub>2</sub>: 53.8 ppm) was used as a standard. Mass spectra (MS) were recorded with Shimadzu GCMS-QP2010Plus mass spectrometer based on electron-impact (EI) ionization. High-resolution mass spectra (HRMS) were recorded with JEOL JMS-T100LP mass spectrometer based on electrospray ionization (ESI).

UV-visible absorption spectra were recorded with Hitachi U-4100 absorption spectrophotometer. In the experiment on thermal stability and fatigue resistance of closed-ring isomer, absorption spectra were recorded with JASCO V-630 absorption spectrophotometer. In the experiment on thermal stability, the temperature of sample solutions was controlled by using a temperature controller (ESPEC SH-221).

Fluorescence spectra and fluorescence quantum yields were measured with an absolute PL quantum yield measurement system (Hamamatsu Photonics C9920-02G). Before the fluorescence measurement, sample solutions were deaerated by bubbling with nitrogen gas.

Photoirradiation for photoreactions was carried out using a 300 W xenon lamp (Asahi spectra MAX-303) with band-pass optical filters or a monochromator (Ritsu MC-10N), or an LED irradiation system (Asahi spectra CL-1501, LED head: CL-H1-405-9-1 for 405 nm, CL-H1-525-7-1 for 525 nm).

The cyclization quantum yields of **2a** and **3a** in 1,4-dioxane under irradiation with 330 nm light were determined using **1a** in 1,4-dioxane ( $\Phi_{oc} = 0.23$ )<sup>S2</sup> as a reference. The cycloreversion quantum yields of **2b** and **3b** in 1,4-dioxane under irradiation with 520 nm light were determined using 1,2-bis(2,4-dimethyl-5-phenyl-3-thienyl)perfluorocyclopentene in hexane ( $\Phi_{co} = 0.0223$ )<sup>S3</sup> as a reference. The cycloreversion quantum yield of **3b** in ethanol under irradiation with 520 nm light was determined using **3b** in 1,4-dioxane as a reference.

The molecular geometries of **1–3** were calculated at  $\omega$ B97XD/6-31G(d) level of theory (Gaussian 09 program).<sup>S4</sup>

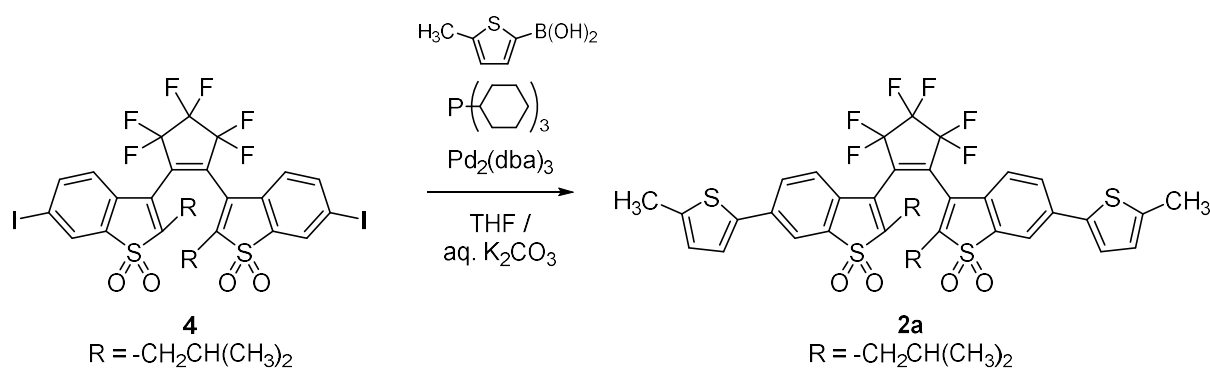

**Scheme S1** Synthesis of **2a**.

### 1,2-Bis(2-isobutyl-6-(5-methylthiophen-2-yl)-1-benzothiophen-1,1-dioxide-3-yl)perfluoro-cyclopentene (**2a**)

To a THF solution (17 mL) containing **4**<sup>S5</sup> (0.17 g, 0.20 mmol) and 5-methylthiophen-2-yl boronic acid (0.075 g, 0.53 mmol) were added saturated  $\text{K}_2\text{CO}_3$  aqueous solution (17 mL), tris(dibenzylideneacetone)dipalladium(0) (0.095 g, 0.10 mmol) and 18% tricyclohexylphosphine toluene solution (8 drops) and the mixture was stirred at room temperature for 1 h. The mixture was extracted with  $\text{CHCl}_3$  and the organic layer was washed with dilute hydrochloric acid,  $\text{Na}_2\text{S}_2\text{O}_3$  aqueous solution and brine, dried over  $\text{MgSO}_4$ , filtrated and concentrated. The residue was purified by silica gel column chromatography (hexane : ethyl acetate = 4 : 1) to give **2a** as orange solids (0.083 g, 0.10 mmol; 52%). The obtained product was further purified by preparative HPLC (pump: Hitachi L-6250, detector: Hitachi L-7400 (313 nm), column: Wakosil<sup>®</sup> 5SIL ( $\phi 20$  mm  $\times$  250 mm), hexane : ethyl acetate = 90 : 10, 7 mL  $\text{min}^{-1}$ ). The purity was confirmed by analytical HPLC (pump: Hitachi L-2130, detector: Hitachi L-2420 (313 nm), column: Wakosil<sup>®</sup> 5SIL ( $\phi 4.6$  mm  $\times$  250 mm), hexane : ethyl acetate = 90 : 10, 1 mL  $\text{min}^{-1}$ ), as shown in Fig. S4.

$^1\text{H}$  NMR (400 MHz,  $\text{CD}_2\text{Cl}_2$ )  $\delta$  0.72 (d, 6H,  $J = 6.4$  Hz), 0.86 (d, 6H,  $J = 6.4$  Hz), 0.98 (d, 2.1H,  $J = 6.4$  Hz), 1.07 (d, 2.1H,  $J = 6.4$  Hz), 1.99-2.17 (m, 6H), 2.19-2.25 (m, 2.3H), 2.49 (s, 2.1H), 2.54 (s, 6H), 6.75 (dd, 0.8H,  $J = 4, 0.8$  Hz), 6.82 (dd, 2H,  $J = 4, 0.8$  Hz), 7.06 (d, 0.9H,  $J = 8.4$  Hz), 7.18 (d, 0.7H,  $J = 3.6$  Hz), 7.27-7.29 (m, 4H), 7.53 (dd, 0.9H,  $J = 8.4, 2.0$  Hz), 7.76 (dd, 2H,  $J = 8.4, 1.6$  Hz), 7.80 (d, 0.7H,  $J = 2.0$  Hz), 7.94 (d, 2H,  $J = 2.0$  Hz);  $^{13}\text{C}$  NMR (100 MHz,  $\text{CD}_2\text{Cl}_2$ )  $\delta$  15.67, 15.72, 21.92, 22.56, 22.60, 23.70, 26.47, 26.63, 35.07, 35.10, 118.91, 119.11, 124.46, 124.52, 125.33, 125.83, 125.96, 127.25, 127.33, 127.45, 127.47, 129.74, 129.97, 137.05, 137.09, 138.23, 138.27, 138.81, 138.85, 143.08, 143.27, 146.65, 146.78; MS (EI)  $m/z$  808  $[\text{M}]^+$ ; HRMS (ESI, positive)  $m/z$  calcd for  $\text{C}_{39}\text{H}_{34}\text{F}_6\text{O}_4\text{S}_4\text{Na}$   $[\text{M}+\text{Na}]^+$  831.1142, found 831.1125; Mp 191–192 °C.

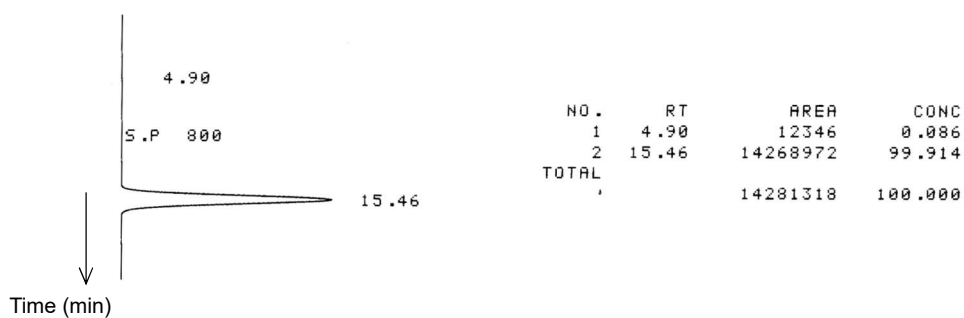

Fig. S4 HPLC chromatogram of **2a**.

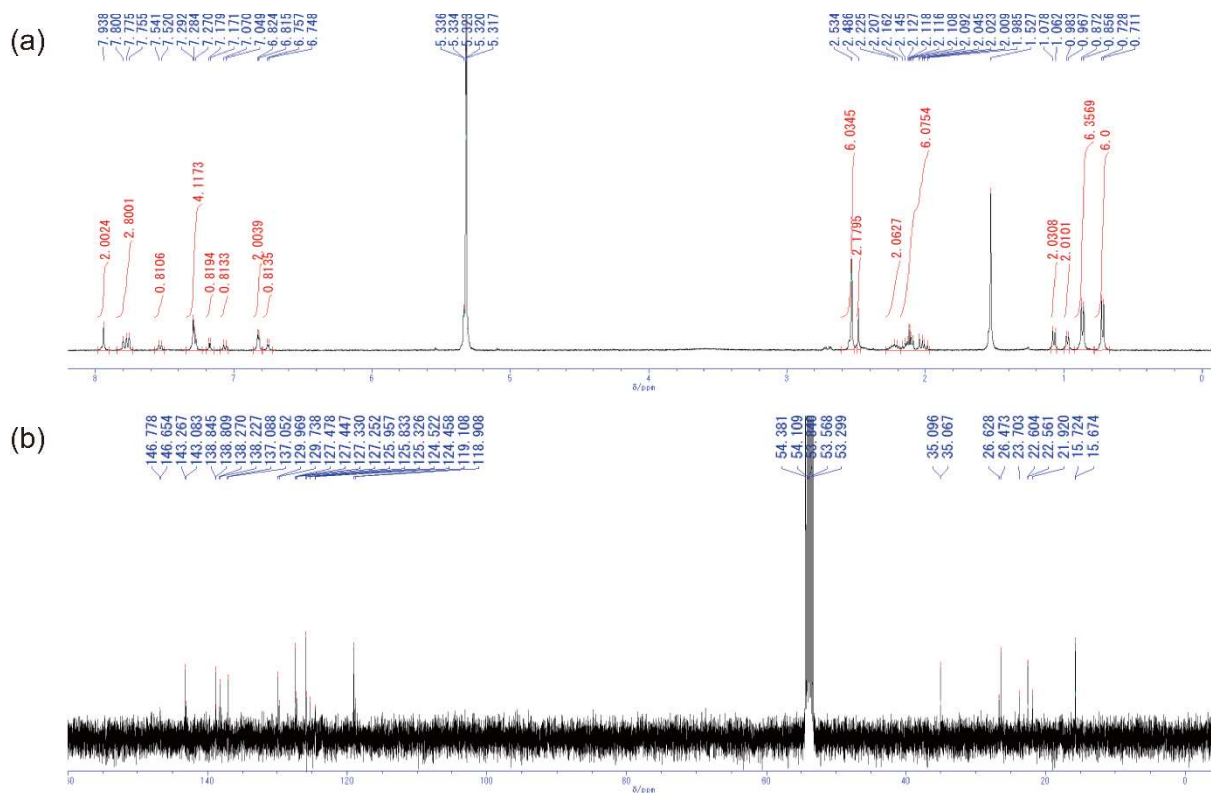

Fig. S5 400 MHz <sup>1</sup>H NMR (a) and 100 MHz <sup>13</sup>C NMR spectra (b) of **2a** in CD<sub>2</sub>Cl<sub>2</sub>.

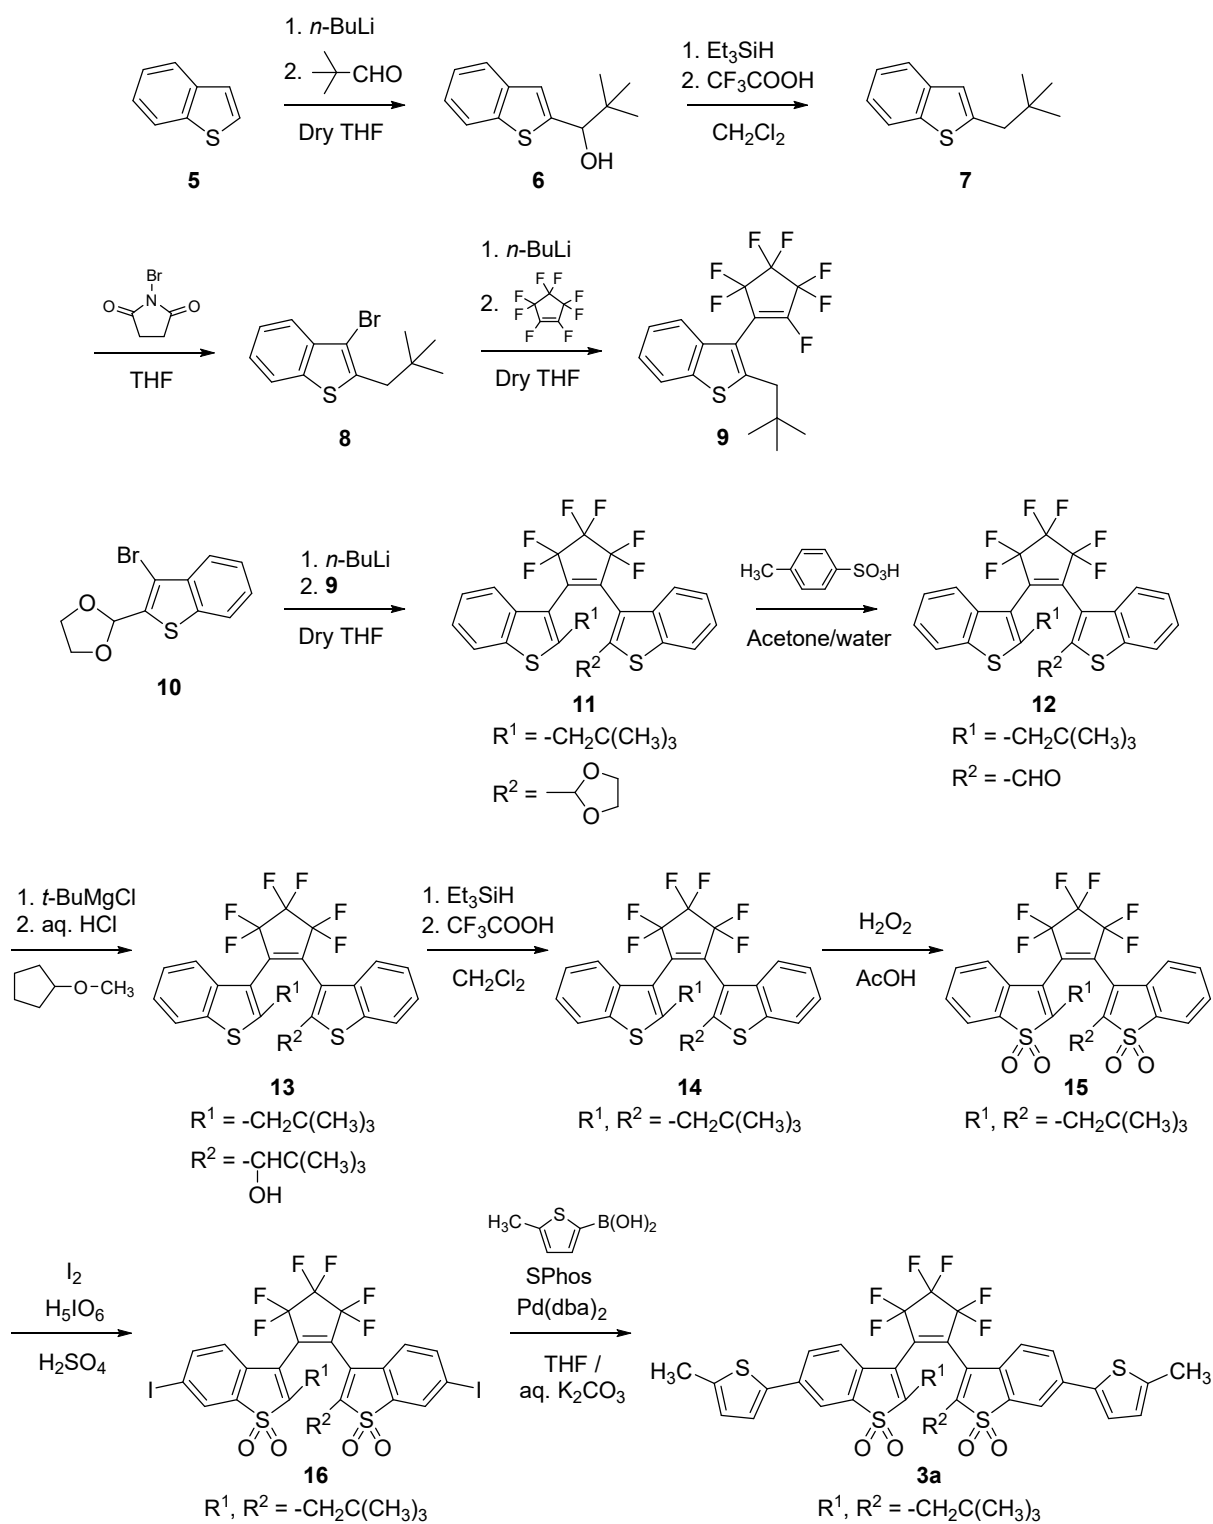

Scheme S2 Synthesis of **3a**.



### 1-(Benzo[*b*]thiophen-2-yl)-2,2-dimethylpropan-1-ol (**6**)

To a dry THF solution (60 mL) containing benzo[*b*]thiophene (**5**) (10 g, 75 mmol) was slowly added 1.6 M *n*-BuLi hexane solution (58 mL, 93 mmol) at  $-78\text{ }^{\circ}\text{C}$  under a nitrogen atmosphere and the mixture was stirred for 1 h at the same temperature. Pivalaldehyde (10 mL, 91 mmol) was slowly added at  $-78\text{ }^{\circ}\text{C}$  and the mixture was stirred for 1 h at  $-78\text{ }^{\circ}\text{C}$  followed by stirring for 17 h at room temperature. The reaction was quenched by adding water. The resulting mixture was extracted with diethyl ether and the organic layer was washed with brine, dried over  $\text{MgSO}_4$ , filtrated and concentrated. The residue was purified by silica gel column chromatography (hexane : ethyl acetate = 9 : 1) to give **6** as white solids (11 g, 50 mmol; 67%).

$^1\text{H}$  NMR (400 MHz,  $\text{CDCl}_3$ , TMS)  $\delta$  1.05 (s, 9H), 2.13 (d, 1H,  $J = 3.2\text{ Hz}$ ), 4.73 (d, 1H,  $J = 3.2\text{ Hz}$ ), 7.18 (s, 1H), 7.28-7.36 (m, 2H), 7.73 (d, 1H,  $J = 7.6\text{ Hz}$ ), 7.81 (d, 1H,  $J = 8.0\text{ Hz}$ ); MS (EI)  $m/z$  220  $[\text{M}]^+$ .

### 2-Neopentylbenzo[*b*]thiophene (**7**)

To a  $\text{CH}_2\text{Cl}_2$  solution (40 mL) containing **6** (4.0 g, 18 mmol) was slowly added triethylsilane (4.0 mL, 25 mmol) at  $0\text{ }^{\circ}\text{C}$  and the mixture was stirred for 25 min at  $10\text{ }^{\circ}\text{C}$ . After cooled down to  $0\text{ }^{\circ}\text{C}$  again, trifluoroacetic acid (4.0 mL, 52 mmol) was slowly added. The mixture was stirred for 17 h at room temperature. The resulting mixture was extracted with hexane and the organic layer was washed with brine, dried over  $\text{MgSO}_4$ , filtrated and concentrated. Recrystallization from methanol afforded **7** as white solids (3.2 g, 16 mmol; 86%).

$^1\text{H}$  NMR (400 MHz,  $\text{CDCl}_3$ , TMS)  $\delta$  1.02 (s, 9H), 2.77 (s, 2H), 6.98 (s, 1H), 7.24-7.33 (m, 2H), 7.69 (d, 1H,  $J = 7.6\text{ Hz}$ ), 7.76 (d, 1H,  $J = 8.0\text{ Hz}$ ); MS (EI)  $m/z$  204  $[\text{M}]^+$ .

### 3-Bromo-2-neopentylbenzo[*b*]thiophene (**8**)

To a THF solution (80 mL) containing **7** (4.5 g, 22 mmol) was added *N*-bromosuccinimide (4.3 g, 24 mmol) in several portions at  $0\text{ }^{\circ}\text{C}$  and the mixture was stirred for 18 h at room temperature. The resulting mixture was treated with  $\text{NaHCO}_3$  aqueous solution followed by  $\text{Na}_2\text{S}_2\text{O}_3$  aqueous solution and extracted with hexane. The organic layer was washed with brine, dried over  $\text{MgSO}_4$ , filtrated and concentrated. The residue was purified by silica gel column chromatography (hexane) to give **8** as a colourless oil (6.1 g, 22 mmol; 98%).

$^1\text{H}$  NMR (400 MHz,  $\text{CDCl}_3$ , TMS)  $\delta$  1.07 (s, 9H), 2.90 (s, 2H), 7.34 (t, 1H,  $J = 7.6\text{ Hz}$ ), 7.42 (t, 1H,  $J = 7.6\text{ Hz}$ ), 7.73-7.78 (m, 2H); MS (EI)  $m/z$  284  $[\text{M}+2]^+$ , 282  $[\text{M}]^+$ .

### 2-Neopentyl-3-(perfluorocyclopent-1-en-1-yl)benzo[*b*]thiophene (9)

To a dry THF solution (25 mL) containing **8** (1.7 g, 6.0 mmol) was slowly added 1.6 M *n*-BuLi hexane solution (3.8 mL, 6.1 mmol) at  $-78\text{ }^{\circ}\text{C}$  under a nitrogen atmosphere and the mixture was stirred for 1 h at the same temperature. Octafluorocyclopentene (2.4 mL, 18 mmol) was added in one portion at  $-78\text{ }^{\circ}\text{C}$ . The mixture was stirred for 1 h at  $-78\text{ }^{\circ}\text{C}$  and then stirred for 18 h at room temperature. The reaction was quenched by adding water. The resulting mixture was extracted with diethyl ether and the organic layer was washed with brine, dried over  $\text{MgSO}_4$ , filtrated and concentrated. The residue was purified by silica gel column chromatography (hexane). Recrystallization from methanol afforded **9** as white solids (1.5 g, 3.8 mmol; 63%).

$^1\text{H}$  NMR (400 MHz,  $\text{CDCl}_3$ , TMS)  $\delta$  1.02 (s, 9H), 2.77 (s (br), 2H), 7.35-7.43 (m, 3H), 7.81 (d, 1H,  $J = 8.4\text{ Hz}$ ); MS (EI)  $m/z$  396  $[\text{M}]^+$ .

### 2-(3-(3,3,4,4,5,5-Hexafluoro-2-(2-neopentylbenzo[*b*]thiophen-3-yl)cyclopent-1-en-1-yl)-benzo[*b*]thiophen-2-yl)-1,3-dioxolane (11)

To a dry THF solution (60 mL) containing 2-(3-bromobenzo[*b*]thiophen-2-yl)-1,3-dioxolane<sup>S6</sup> (**10**) (2.8 g, 9.8 mmol) was slowly added 1.6 M *n*-BuLi hexane solution (6.2 mL, 9.9 mmol) at  $-78\text{ }^{\circ}\text{C}$  under a nitrogen atmosphere and the mixture was stirred for 1 h at the same temperature. A dry THF solution (20 mL) containing **9** (4.2 g, 11 mmol) was slowly added at  $-78\text{ }^{\circ}\text{C}$  and the mixture was stirred for 20 h at  $-50\text{ }^{\circ}\text{C}$ . The reaction was quenched by adding water. The resulting mixture was extracted with diethyl ether and the organic layer was washed with brine, dried over  $\text{MgSO}_4$ , filtrated and concentrated. The residue was purified by silica gel column chromatography (hexane) to give **11** as white solids (4.0 g, 6.9 mmol; 70%).

$^1\text{H}$  NMR (400 MHz,  $\text{CD}_2\text{Cl}_2$ )  $\delta$  0.86 (s, 9H), 1.04 (s, 3.79H), 1.89 (d, 1H,  $J = 14.8\text{ Hz}$ ), 2.54 (d, 0.42H,  $J = 14.8\text{ Hz}$ ), 2.68 (d, 1H,  $J = 14.8\text{ Hz}$ ), 2.81 (d, 0.42H,  $J = 14.8\text{ Hz}$ ), 3.41 (q, 1H,  $J = 7.2\text{ Hz}$ ), 3.73-3.78 (m, 1H), 3.86-3.94 (m, 2H), 3.99-4.04 (m, 0.42H), 4.07-4.13 (m, 0.42H), 4.16-4.25 (m, 0.84H), 5.45 (s, 1H), 6.03 (s, 0.42H), 7.05 (t, 0.42H,  $J = 7.2\text{ Hz}$ ), 7.22 (t, 0.42H,  $J = 7.2\text{ Hz}$ ), 7.26 (t, 0.42H,  $J = 7.2\text{ Hz}$ ), 7.33-7.48 (m, 5H), 7.65 (d, 0.42H,  $J = 8.4\text{ Hz}$ ), 7.70 (d, 0.42H,  $J = 8.4\text{ Hz}$ ), 7.76-7.84 (m, 4.4H); MS (EI)  $m/z$  582  $[\text{M}]^+$ .

**3-(3,3,4,4,5,5-Hexafluoro-2-(2-neopentylbenzo[*b*]thiophen-3-yl)cyclopent-1-en-1-yl)-benzo[*b*]thiophene-2-carbaldehyde (12)**

To an acetone/water (v/v 9 : 1) solution (100 mL) containing **11** (3.9 g, 6.7 mmol) was added *p*-toluene sulfonic acid monohydrate (15.5 g, 81.5 mmol) and the mixture was stirred for 24 h at 60 °C. After the solvent was removed by evaporation, the resulting mixture was extracted with CH<sub>2</sub>Cl<sub>2</sub>. The organic layer was washed with brine, dried over MgSO<sub>4</sub>, filtrated and concentrated. The residue was purified by silica gel column chromatography (hexane : ethyl acetate = 5 : 1) to give **12** as orange powders (3.5 g, 6.5 mmol; 97%).

<sup>1</sup>H NMR (400 MHz, CD<sub>2</sub>Cl<sub>2</sub>) δ 0.91 (s, 9H), 1.01 (s, 6.27H), 1.99 (d, 1H, *J* = 14.8 Hz), 2.37 (d, 0.68H, *J* = 14.8 Hz), 2.71 (d, 1H, *J* = 14.8 Hz), 2.73 (d, 0.68H, *J* = 14.8 Hz), 7.18 (t, 0.76H, *J* = 7.2 Hz), 7.29 (t, 0.68H, *J* = 7.2 Hz), 7.34-7.46 (m, 3.31H), 7.54-7.68 (m, 4.21H), 7.74 (d, 1H, *J* = 8.4 Hz), 7.79 (d, 1.38H, *J* = 8.4 Hz), 7.90 (d, 1H, *J* = 8.0 Hz), 7.95 (d, 1H, *J* = 8.4 Hz), 9.85 (s, 1H), 10.13 (s, 0.64H); MS (EI) *m/z* 538 [M]<sup>+</sup>.

**1-(3-(3,3,4,4,5,5-Hexafluoro-2-(2-neopentylbenzo[*b*]thiophen-3-yl)cyclopent-1-en-1-yl)-benzo[*b*]thiophen-2-yl)-2,2-dimethylpropan-1-ol (13)**

To a cyclopentyl methyl ether solution (60 mL) containing **12** (1.3 g, 2.4 mmol) was slowly added 1.0 M *t*-BuMgCl THF solution (9.3 mL, 9.3 mmol) at room temperature under a nitrogen atmosphere and the mixture was stirred for 21 h at room temperature. The reaction was quenched by adding dilute hydrochloric acid. The resulting mixture was extracted with diethyl ether and the organic layer was washed with brine, dried over MgSO<sub>4</sub>, filtrated and concentrated. The residue was purified by silica gel column chromatography (hexane : ethyl acetate = 95 : 5) to give **13** as pale brown solids (1.1 g, 1.8 mmol; 76%).

<sup>1</sup>H NMR (400 MHz, CDCl<sub>3</sub>, TMS) δ 0.80 (s, 9H), 0.85 (s, 9H), 1.61 (d, 2H *J* = 14.8 Hz), 2.49 (d, 2H, *J* = 14.8 Hz), 4.21 (d, 1H, *J* = 4.8 Hz), 7.35-7.48 (m, 4H), 7.76-7.84 (m, 4H); MS (EI) *m/z* 596 [M]<sup>+</sup>, 595 [M-H]<sup>+</sup>.

### **1,2-Bis(2-neopentylbenzo[*b*]thiophen-3-yl)perfluorocyclopentene (14)**

To a CH<sub>2</sub>Cl<sub>2</sub> solution (25 mL) containing **13** (0.41 g, 0.69 mmol) was slowly added triethylsilane (0.44 mL, 2.8 mmol) at 0 °C and the mixture was stirred for 1 h at 10 °C. After cooled down to 0 °C again, trifluoroacetic acid (0.44 mL, 5.7 mmol) was slowly added and the mixture was stirred for 5 min at 0 °C. After that, the mixture was stirred for 12 h at room temperature. The resulting mixture was extracted with hexane and the organic layer was washed with brine, dried over MgSO<sub>4</sub>, filtrated and concentrated. The residue was purified by silica gel column chromatography (hexane : ethyl acetate = 97 : 3) to give **14** as white solids (0.31 g, 0.53 mmol; 78%).

<sup>1</sup>H NMR (400 MHz, CDCl<sub>3</sub>, TMS) δ 0.81 (s, 18H), 1.07 (s, 2.88H), 1.72 (d, 2H, *J* = 15.2 Hz), 2.52 (d, 0.32H, *J* = 14.4 Hz), 2.57 (d, 2H, *J* = 15.2 Hz), 2.94 (d, 0.32H, *J* = 14.4 Hz), 7.09-7.16 (m, 0.64H), 7.33 (t, 2H, *J* = 7.2 Hz), 7.38 (t, 2H, *J* = 7.2 Hz), 7.51 (d, 0.32H, *J* = 7.2 Hz), 7.56 (d, 0.32H, *J* = 7.2 Hz), 7.73 (d, 2H, *J* = 7.2 Hz), 7.78 (d, 2H, *J* = 7.2 Hz); MS (EI) *m/z* 580 [M]<sup>+</sup>.

### **1,2-Bis(2-neopentylbenzo[*b*]thiophen-1,1-dioxide-3-yl)perfluorocyclopentene (15)**

To an acetic acid solution (20 mL) containing **14** (0.40 g, 0.69 mmol) was slowly added 2.8 mL of 30–35.5% hydrogen peroxide solution 120 °C. The mixture was heated at the same temperature for 30 min. The resulting mixture was poured into cold ice water, and precipitates were filtered and washed with water to give **15** as white solids (0.34 g, 0.53 mmol; 77%).

<sup>1</sup>H NMR (400 MHz, CD<sub>2</sub>Cl<sub>2</sub>) δ 0.94 (s, 18H), 1.15 (s, 9H), 1.92 (d, 2H, *J* = 14.8 Hz), 2.08 (d, 2H, *J* = 14.8 Hz), 2.34 (d, 1H, *J* = 14.8 Hz), 2.61 (d, 1H, *J* = 14.8 Hz), 7.04 (d, 1H, *J* = 7.2 Hz), 7.30-7.35 (m, 3H), 7.42 (t, 1H, *J* = 7.6 Hz), 7.60-7.67 (m, 5H), 7.79 (m, 2H); MS (EI) *m/z* 644 [M]<sup>+</sup>.

### **1,2-Bis(6-iodo-2-neopentylbenzo[*b*]thiophen-1,1-dioxide-3-yl)perfluorocyclopentene (16)**

A concentrated sulfuric acid solution (8 mL) containing **15** (0.15 g, 0.23 mmol) was cooled to 0 °C, and the mixture was stirred. Orthoperiodic acid (0.090 g, 0.40 mmol) and iodine (0.20 g, 0.79 mmol) were added to the solution, and the mixture was stirred at 0 °C for 4 h. The resulting mixture was poured into cold ice water. The mixture was extracted with CHCl<sub>3</sub> and the organic layer was washed with NaHCO<sub>3</sub> aqueous solution, Na<sub>2</sub>S<sub>2</sub>O<sub>3</sub> aqueous solution and brine, dried over MgSO<sub>4</sub>, filtrated and concentrated. The residue was purified by silica gel column chromatography (hexane : ethyl acetate = 4 : 1) to give **16** as yellow solids (0.12 g, 0.13 mmol; 57%).

<sup>1</sup>H NMR (400 MHz, CDCl<sub>3</sub>, TMS) δ 0.96 (s, 18H), 1.15 (s, 9H), 1.97 (d, 2H, *J* = 15.2 Hz), 2.04 (d, 2H, *J* = 15.2 Hz), 2.31 (d, 1H, *J* = 14.8 Hz), 2.58 (d, 1H, *J* = 14.8 Hz), 6.69 (d, 1H, *J* = 8.0 Hz), 7.01 (dd, 2H, *J* = 8.0, 2.0 Hz), 7.66 (dd, 1H, *J* = 8.0, 1.2 Hz), 7.95 (d, 2H, *J* = 1.2 Hz), 7.93 (d, 1H, *J* = 1.2 Hz), 8.08 (d, 2H, *J* = 1.6 Hz); MS (EI) *m/z* 896 [M]<sup>+</sup>.

**1,2-Bis(6-(5-methylthiophen-2-yl)-2-neopentylbenzo[*b*]thiophen-1,1-dioxide-3-yl)perfluorocyclopentene (3a)**

To a THF solution (10 mL) containing **16** (0.19 g, 0.21 mmol) and 5-methylthiophen-2-yl boronic acid (0.080 g, 0.56 mmol) were added saturated K<sub>2</sub>CO<sub>3</sub> aqueous solution (10 mL). The oxygen dissolved in the mixture was removed by nitrogen-gas bubbling for 20 min. After that, bis(dibenzylideneacetone)palladium(0) (0.024 g, 0.042 mmol) and 2-dicyclohexylphosphino-2',6'-dimethoxybiphenyl (SPhos) (0.017 g, 0.041 mmol) were added, and the mixture was refluxed for 30 min. The resulting mixture was neutralized with dilute hydrochloric acid and extracted with CHCl<sub>3</sub>, and the organic layer was washed with brine, dried over MgSO<sub>4</sub>, filtrated and concentrated. The residue was purified by silica gel column chromatography (hexane : ethyl acetate = 9 : 1) to give **3a** as orange solids (0.048 g, 0.057 mmol; 27%). The obtained product was further purified by preparative HPLC (pump: Hitachi L-2130, detector: Hitachi L-2420 (313 nm), column: Wakosil<sup>®</sup> 5SIL (φ20 mm × 250 mm), hexane : ethyl acetate = 85 : 15, 5 mL min<sup>-1</sup>). The purity was confirmed by analytical HPLC (pump: Hitachi L-2130, detector: Hitachi L-2420 (313 nm), column: Wakosil<sup>®</sup> 5SIL (φ4.6 mm × 250 mm), hexane : ethyl acetate = 85 : 15, 1 mL min<sup>-1</sup>), as shown in Fig. S6.

<sup>1</sup>H NMR (400 MHz, CD<sub>2</sub>Cl<sub>2</sub>) δ 0.96 (s, 18H), 1.16 (s, 8.3H), 1.98 (d, 2H, *J* = 14.8 Hz), 2.10 (d, 2H, *J* = 14.8 Hz), 2.34 (d, 0.91H, *J* = 14.8 Hz), 2.49 (s, 2.71H), 2.54 (s, 6H), 2.62 (d, 0.91H, *J* = 14.8 Hz), 6.75 (m, 0.93H), 6.83 (m, 2H), 7.00 (d, 0.93H, *J* = 8.4 Hz), 7.16 (d, 0.91H, *J* = 3.6 Hz), 7.28-7.30 (m, 4H), 7.45 (dd, 0.93 H, *J* = 8.4, 1.2 Hz), 7.75 (dd, 2.82 H, *J* = 8.4, 1.2 Hz), 7.95 (d, 2H, *J* = 1.2 Hz); <sup>13</sup>C NMR (100 MHz, CD<sub>2</sub>Cl<sub>2</sub>) δ 15.66, 15.72, 30.21, 30.40, 32.81, 32.85, 40.54, 41.32, 118.83, 119.10, 124.78, 124.87, 124.94, 125.05, 125.87, 126.02, 127.27, 127.32, 127.46, 127.49, 129.41, 129.99, 136.95, 137.05, 138.13, 138.29, 138.81, 138.84, 143.12, 143.32, 146.95, 147.22; MS (EI) *m/z* 836 [M]<sup>+</sup>; HRMS (ESI, positive) *m/z* calcd for C<sub>41</sub>H<sub>38</sub>F<sub>6</sub>O<sub>4</sub>S<sub>4</sub>Na [M+Na]<sup>+</sup> 859.1455, found 859.1442; Mp 222–223 °C.

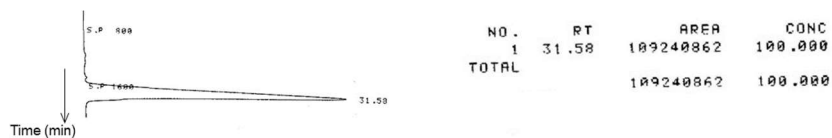

**Fig. S6** HPLC chromatogram of **3a**.

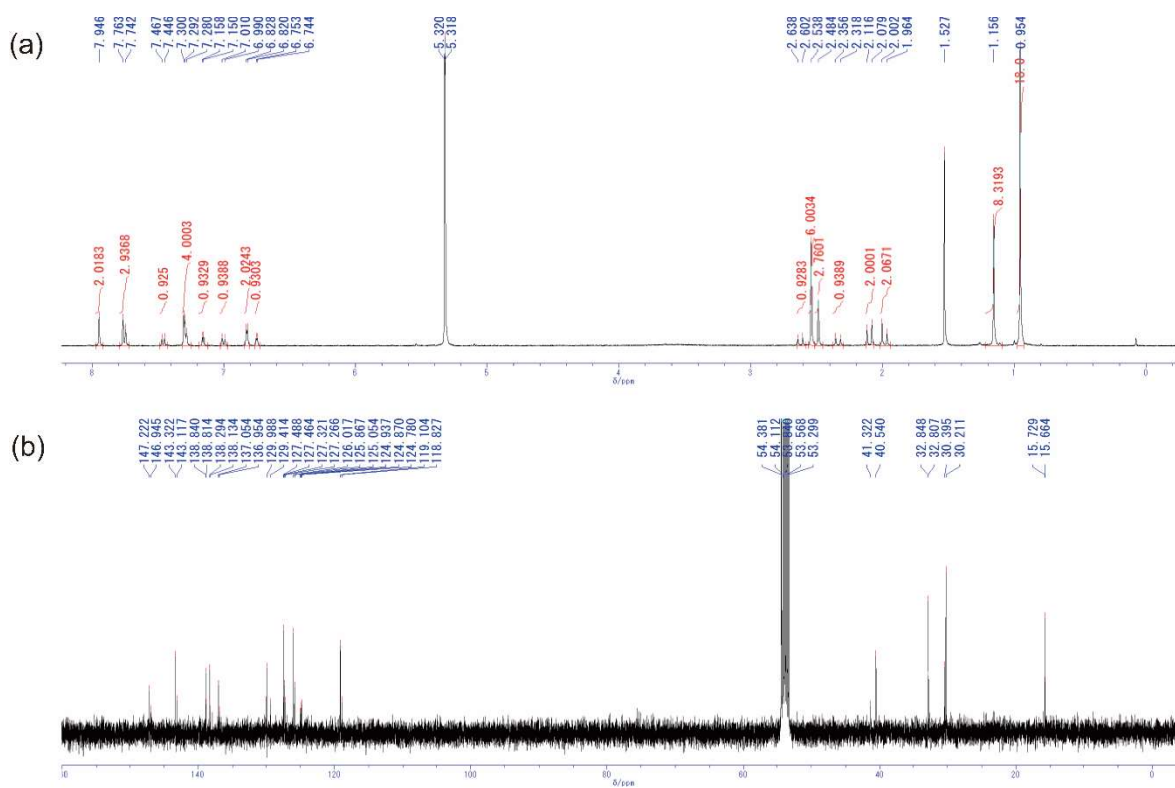

**Fig. S7** 400 MHz <sup>1</sup>H NMR (a) and 100 MHz <sup>13</sup>C NMR (b) spectra of **3a** in CD<sub>2</sub>Cl<sub>2</sub>.

## References

- S1 K. Uno, H. Niikura, M. Morimoto, Y. Ishibashi, H. Miyasaka and M. Irie, In situ preparation of highly fluorescent dyes upon photoirradiation, *J. Am. Chem. Soc.*, 2011, **133**, 13558–13564.
- S2 M. Irie and M. Morimoto, Photoswitchable turn-on mode fluorescent diarylethenes: Strategies for controlling the switching response, *Bull. Chem. Soc. Jpn.*, 2018, **91**, 237–250.
- S3 T. Sumi, Y. Takagi, A. Yagi, M. Morimoto and M. Irie, Photoirradiation wavelength dependence of cycloreversion quantum yields of diarylethenes, *Chem. Commun.*, 2014, **50**, 3928–3930.
- S4 Gaussian 09, Revision D.01, M. J. Frisch, G. W. Trucks, H. B. Schlegel, G. E. Scuseria, M. A. Robb, J. R. Cheeseman, G. Scalmani, V. Barone, B. Mennucci, G. A. Petersson, H. Nakatsuji, M. Caricato, X. Li, H. P. Hratchian, A. F. Izmaylov, J. Bloino, G. Zheng, J. L. Sonnenberg, M. Hada, M. Ehara, K. Toyota, R. Fukuda, J. Hasegawa, M. Ishida, T. Nakajima, Y. Honda, O. Kitao, H. Nakai, T. Vreven, J. A. Montgomery, Jr., J. E. Peralta, F. Ogliaro, M. Bearpark, J. J. Heyd, E. Brothers, K. N. Kudin, V. N. Staroverov, T. Keith, R. Kobayashi, J. Normand, K. Raghavachari, A. Rendell, J. C. Burant, S. S. Iyengar, J. Tomasi, M. Cossi, N. Rega, J. M. Millam, M. Klene, J. E. Knox, J. B. Cross, V. Bakken, C. Adamo, J. Jaramillo, R. Gomperts, R. E. Stratmann, O. Yazyev, A. J. Austin, R. Cammi, C. Pomelli, J. W. Ochterski, R. L. Martin, K. Morokuma, V. G. Zakrzewski, G. A. Voth, P. Salvador, J. J. Dannenberg, S. Dapprich, A. D. Daniels, O. Farkas, J. B. Foresman, J. V. Ortiz, J. Cioslowski, and D. J. Fox, Gaussian, Inc., Wallingford CT, 2013.
- S5 K. Uno, M. L. Bossi, M. Irie, V. N. Belov and S. W. Hell, Reversibly photoswitchable fluorescent diarylethenes resistant against photobleaching in aqueous solutions, *J. Am. Chem. Soc.*, 2019, **141**, 16471–16178.
- S6 S. Fredrich, A. Bonasera, V. Valderrey and S. Hecht, Sensitive assays by nucleophile-induced rearrangement of photoactivated diarylethenes, *J. Am. Chem. Soc.*, 2018, **140**, 6432–6440.
